# Supplementary material for: Therapeutic effects of herbal-medicine combined therapy for COVID-19: A systematic review and meta-analysis of randomized controlled trials
Source: PubMed Central journal article supplement (PMC9475194; doi:10.3389/fphar.2022.950012), 2022-09-01
Supplement: DataSheet1.pdf [file DataSheet1.pdf]

### Appendix 3 Random effect model of chest CT and fatigue improvement

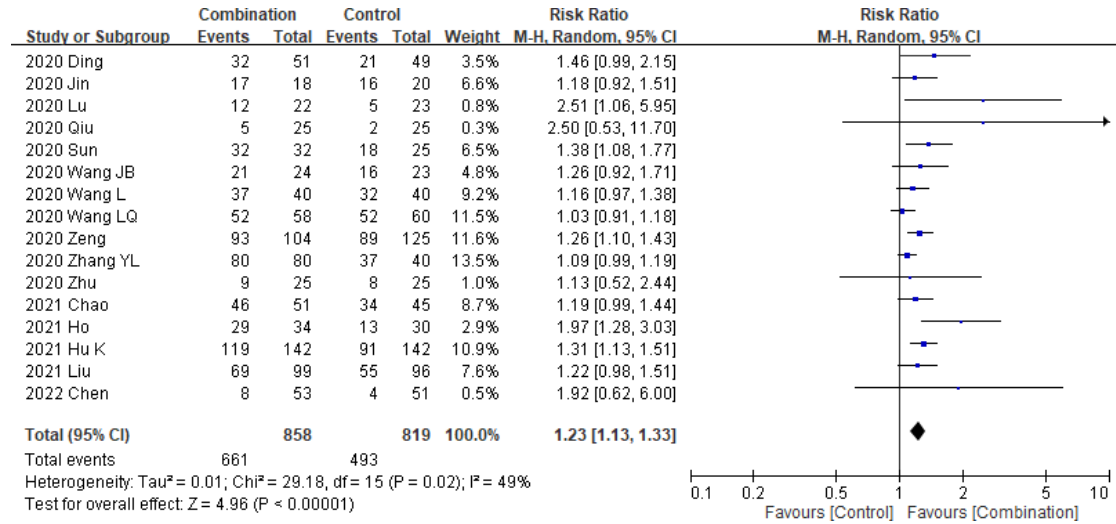

Figure 5a: comparison of HM combined therapy for chest CT manifestations in COVID19 patients using random effect model

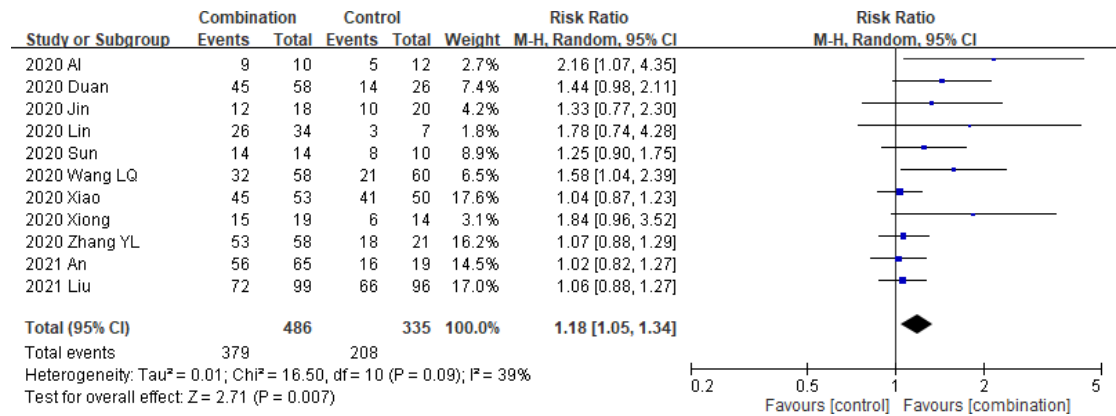

Figure 5b: comparison of HM combined therapy for fatigue reduction cases in COVID19 patients using random effect model
